# Supplementary material for: Proteomics Recapitulates Ovarian Proteins Relevant to Puberty and Fertility in Brahman Heifers (Bos indicus L.)
Source: MDPI journal article supplement (doi:10.3390/genes10110923), 2019-11-12
Supplement: s1 [file s1]

**Table S1: Total differentially expressed proteins in pre- vs post-pubertal Brahman heifers.**

| ProteinID* | Gene     | log2FC* | adj.pvalue | Protein Names                                     |
|------------|----------|---------|------------|---------------------------------------------------|
| A6QR14     | DHCR24   | 3.28    | 0.000      | 24-dehydrocholesterol reductase                   |
| P00257     | FDX1 ADX | 3.02    | 0.000      | Adrenodoxin                                       |
| P14893     | HSD3B    | 2.92    | 0.000      | 3 beta-hydroxysteroid dehydrogenase               |
| Q3ZC79     | HMGCS1   | 2.91    | 0.000      | 3-hydroxy-3-methylglutaryl coenzyme A synthase    |
| F1MTJ9     | LSS      | 2.87    | 0.001      | Terpene cyclase                                   |
| Q148K8     | FDXR     | 2.66    | 0.000      | NADPH:adrenodoxin oxidoreductase                  |
| Q3ZCA8     | TPD52    | 2.66    | 0.000      | Tumor protein D52                                 |
| F1MHB8     | QPRT     | 2.13    | 0.000      | Nicotinate-nucleotide pyrophosphorylase           |
| F1N647     | FASN     | 2.11    | 0.000      | Fatty acid synthase                               |
| A3KMX9     | CYP11A1  | 2.11    | 0.000      | Cholesterol side-chain cleavage enzyme            |
| Q32PF2     | ACLY     | 1.75    | 0.000      | ATP-citrate synthase                              |
| P41563     | IDH3A    | 1.65    | 0.000      | Isocitrate dehydrogenase                          |
| F1N6P2     |          | 1.48    | 0.000      | Uncharacterized protein                           |
| P11024     | NNT      | 1.37    | 0.000      | NAD(P) transhydrogenase                           |
| Q02827     | NDUFC2   | 1.30    | 0.000      | NADH dehydrogenase [ubiquinone] 1 subunit C2      |
| Q1JPB6     | ACAT2    | 1.29    | 0.000      | Acetyl-Coenzyme A acetyltransferase 2             |
| Q59HJ6     | LONP1    | 1.26    | 0.000      | Lon protease homolog, mitochondrial               |
| E1BJA2     | AIFM1    | 1.26    | 0.000      | Apoptosis inducing factor mitochondria associated |
| P21782     | PTN      | 1.21    | 0.000      | Pleiotrophin (PTN)                                |
| P02694     | RBP1     | 1.20    | 0.000      | Retinol-binding protein 1                         |
| F1MUZ9     | HSPD1    | 1.19    | 0.000      | 60 kDa heat shock protein, mitochondrial          |
| Q29RK1     | CS       | 1.19    | 0.000      | Citrate synthase, mitochondrial                   |
| P41976     | SOD2     | 1.18    | 0.000      | Superoxide dismutase                              |
| P79110     | SLC25A1  | 1.17    | 0.000      | Tricarboxylate transport protein                  |
| P12234     | SLC25A3  | 1.16    | 0.000      | Phosphate carrier protein, mitochondrial          |
| Q3SZ54     | EIF4A1   | 1.15    | 0.000      | Eukaryotic initiation factor 4A-I                 |
| Q148D3     | FH       | 1.15    | 0.000      | Fumarate hydratase                                |
| P61603     | HSPE1    | 1.14    | 0.000      | 10 kDa heat shock protein                         |
| V6F7X8     | REXO2    | 1.10    | 0.000      | Oligoribonuclease                                 |
| P13272     | UQCRCF51 | 1.09    | 0.000      | Cytochrome b-c1 complex subunit Rieske            |
| P49410     | TUFM     | 1.09    | 0.000      | Elongation factor Tu,                             |
| P12344     | GOT2     | 1.04    | 0.000      | Aspartate aminotransferase                        |
| F1MMK2     | G6PD     | 1.03    | 0.000      | Glucose-6-phosphate 1-dehydrogenase               |
| Q3ZCH0     | HSPA9    | 1.03    | 0.000      | Stress-70 protein                                 |
| E1BA13     |          | 1.02    | 0.000      | Uncharacterized protein                           |
| P00125     | CYC1     | 1.02    | 0.000      | Cytochrome c1, heme protein                       |
| Q01321     | NDUFA4   | 1.00    | 0.000      | Cytochrome c oxidase subunit                      |
| Q0VCM4     | PYGL     | 1.00    | 0.000      | Glycogen phosphorylase, liver form                |
| F1MZT4     | MX2      | 0.99    | 0.000      | Interferon-induced GTP-binding protein            |
| Q32LG3     | MDH2     | 0.98    | 0.000      | Malate dehydrogenase, mitochondrial               |
| Q862H7     | S100A11  | 0.97    | 0.000      | Protein S100 (S100 calcium-binding protein)       |
| P35705     | PRDX3    | 0.97    | 0.000      | Thioredoxin-dependent peroxide reductase          |
| G3N3D4     | KCTD12   | 0.95    | 0.000      | Potassium channel tetramerization domain protein  |
| F1MMR6     | CTSD     | 0.92    | 0.000      | Cathepsin D                                       |
| P68002     | VDAC2    | 0.92    | 0.000      | Voltage-dependent anion-selective channel protein |
| P00423     | COX4I1   | 0.90    | 0.000      | Cytochrome c oxidase subunit 4 isoform 1          |
| P11179     | DLST     | 0.90    | 0.000      | Dihydrolipoyllysine-residue succinyltransferase   |
| F1N0I2     | NR2C1    | 0.89    | 0.000      | Nuclear receptor subfamily 2 group C member 1     |

|        |           |      |       |                                                   |
|--------|-----------|------|-------|---------------------------------------------------|
| P48644 | ALDH1A1   | 0.89 | 0.000 | Retinal dehydrogenase 1                           |
| Q9TVD2 | IDH       | 0.88 | 0.001 | NAD(+)-isocitrate dehydrogenase subunit 1         |
| P05630 | ATP5F1D   | 0.87 | 0.000 | ATP synthase subunit delta, mitochondrial         |
| Q2NL19 | IMMT      | 0.86 | 0.000 | MICOS complex subunit MIC60 (Mitofilin)           |
| P01966 | HBA       | 0.86 | 0.000 | Hemoglobin subunit alpha                          |
| A1A4N9 | NME1      | 0.86 | 0.000 | Nucleoside diphosphate kinase                     |
| Q9XSG3 | IDH1 ICDH | 0.85 | 0.000 | Isocitrate dehydrogenase [NADP] cytoplasmic       |
| Q3SZ81 | PSMC3     | 0.84 | 0.000 | PSMC3 protein (Fragment)                          |
| P08166 | AK2       | 0.84 | 0.000 | Adenylate kinase 2, mitochondrial (AK 2)          |
| P20004 | ACO2      | 0.84 | 0.000 | Aconitate hydratase, mitochondrial (Aconitase)    |
| P42028 | NDUFS8    | 0.83 | 0.000 | NADH dehydrogenase                                |
| Q862L1 |           | 0.83 | 0.000 | Similar to tumor protein                          |
| P45879 | VDAC1     | 0.80 | 0.000 | Voltage-dependent anion-selective channel protein |
| Q3ZBF6 | ACADS     | 0.80 | 0.000 | Short-chain specific acyl-CoA dehydrogenase       |
| Q1LZ72 | CNPY2     | 0.80 | 0.000 | Canopy 2 homolog (Zebrafish)                      |
| P00126 | UQCRH     | 0.79 | 0.000 | Cytochrome b-c1 complex subunit 6                 |
| Q3T145 | MDH1      | 0.78 | 0.000 | Malate dehydrogenase, cytoplasmic                 |
| Q2KJ39 | RCN3      | 0.78 | 0.000 | Reticulocalbin-3                                  |
| Q3MHX5 | SUCLG2    | 0.78 | 0.000 | Succinate--CoA ligase [GDP-forming] subunit beta  |
| Q3T0L7 | RPL28     | 0.78 | 0.000 | 60S ribosomal protein L28                         |
| Q0QEQ4 | IDH1      | 0.77 | 0.000 | Isocitrate dehydrogenase 1 (Fragment)             |
| P32007 | SLC25A6   | 0.77 | 0.000 | ADP/ATP translocase 3                             |
| Q3MHW4 | SQRDL     | 0.77 | 0.000 | SQRDL protein                                     |
| Q5E9F5 | TAGLN2    | 0.76 | 0.000 | Transgelin-2                                      |
| P00429 | COX6B1    | 0.76 | 0.000 | Cytochrome c oxidase subunit 6B1                  |
| Q3ZC14 | PGD       | 0.74 | 0.000 | 6-phosphogluconate dehydrogenase                  |
| Q76LV1 | HSP90AB1  | 0.73 | 0.000 | Heat shock protein HSP 90-beta                    |
| Q28035 | GSTA1     | 0.72 | 0.000 | Glutathione S-transferase A1                      |
| Q3MI02 | UQCRC1    | 0.70 | 0.000 | UQCRC1 protein (Fragment)                         |
| P02721 | ATP5PF    | 0.70 | 0.000 | ATP synthase-coupling factor 6, mitochondrial     |
| F1MH57 | ACAD8     | 0.70 | 0.000 | Isobutyryl-CoA dehydrogenase, mitochondrial       |
| G3N3W3 | SLC25A5   | 0.70 | 0.000 | ADP/ATP translocase 2                             |
| F1MWK6 | MFAP2     | 0.70 | 0.000 | Microfibrillar-associated protein 2               |
| P00829 | ATP5F1B   | 0.70 | 0.000 | ATP synthase subunit beta, mitochondrial          |
| Q7JAT2 | ATP8 atp8 | 0.69 | 0.000 | ATP synthase protein 8                            |
| E2GEZ1 | Tom22     | 0.69 | 0.000 | Translocase of outer mitochondrial membrane22     |
| A6H7J6 | P4HB      | 0.69 | 0.000 | Protein disulfide-isomerase                       |
| A7Z066 | CANX canx | 0.69 | 0.000 | Calnexin (Canx protein)                           |
| F1MLB8 | ATP5F1A   | 0.68 | 0.000 | ATP synthase subunit alpha                        |
| F1MWR3 | ETFA      | 0.68 | 0.000 | Electron transfer flavoprotein subunit alpha      |
| P13621 | ATP5PO    | 0.67 | 0.000 | ATP synthase subunit O, mitochondrial             |
| P13620 | ATP5PD    | 0.67 | 0.000 | ATP synthase subunit d, mitochondrial             |
| P00426 | COX5A     | 0.67 | 0.000 | Cytochrome c oxidase subunit 5A                   |
| Q58DR8 | SUCLG1    | 0.67 | 0.000 | Succinate--CoA ligase [ADP/GDP-forming] subunit   |
| Q2TBV3 | ETFB      | 0.66 | 0.000 | Electron transfer flavoprotein subunit beta       |
| Q3SZE6 | NDUFA10   | 0.65 | 0.001 | NDUFA10 protein                                   |
| P33097 | GOT1      | 0.65 | 0.000 | Aspartate aminotransferase, cytoplasmic           |
| D4QBB4 | HBB GLNA1 | 0.65 | 0.000 | Globin A1 (Hemoglobin beta)                       |
| Q3ZBD1 | RAB1A     | 0.63 | 0.000 | RAB1A, member RAS oncogene family                 |
| P23004 | UQCRC2    | 0.61 | 0.000 | Cytochrome b-c1 complex subunit 2,                |

|        |           |      |       |                                                   |
|--------|-----------|------|-------|---------------------------------------------------|
| J9ZXG5 |           | 0.60 | 0.000 | Integrin alpha V subunit                          |
| P07107 | DBI       | 0.60 | 0.000 | Acyl-CoA-binding protein (ACBP)                   |
| Q3ZC41 | ACAA1     | 0.60 | 0.000 | Acetyl-CoA acyltransferase 1                      |
| F1ME65 | CKAP4     | 0.60 | 0.000 | Cytoskeleton associated protein 4                 |
| Q28851 | ATP5MF    | 0.60 | 0.000 | ATP synthase subunit f, mitochondrial             |
| P10096 | GAPDH     | 0.59 | 0.000 | Glyceraldehyde-3-phosphate dehydrogenase          |
| Q3ZCD7 | TECR      | 0.58 | 0.000 | Very-long-chain enoyl-CoA reductase               |
| O02691 | HSD17B10  | 0.58 | 0.000 | 3-hydroxyacyl-CoA dehydrogenase type-2            |
| Q5E936 | TXNDC12   | 0.58 | 0.000 | Thioredoxin domain-containing protein 12          |
| Q9GMB8 | SARS SERS | 0.57 | 0.000 | Serine--tRNA ligase, cytoplasmic                  |
| G3X757 | VCP       | 0.57 | 0.000 | Transitional endoplasmic reticulum ATPase         |
| F1MDC1 | RRBP1     | 0.57 | 0.000 | Uncharacterized protein                           |
| P05631 | ATP5F1C   | 0.56 | 0.000 | ATP synthase subunit gamma                        |
| Q3SZ00 | HADHA     | 0.56 | 0.000 | HADHA,Trifunctional enzyme subunit alpha          |
| Q6VBM2 | PAICS     | 0.56 | 0.000 | Phosphoribosylaminoimidazole carboxylase          |
| F1MIH9 | PLBD2     | 0.55 | 0.000 | Phospholipase B-like                              |
| Q3T0Q4 | NME2      | 0.54 | 0.000 | Nucleoside diphosphate kinase B                   |
| P38447 | ENDOG     | 0.54 | 0.021 | Endonuclease G, mitochondrial                     |
| A5D7S0 | NAPA      | 0.54 | 0.000 | Alpha-soluble NSF attachment protein              |
| A5D973 | PPP2R1A   | 0.53 | 0.004 | Alpha isoform of regulatory subunit A             |
| P00432 | CAT       | 0.52 | 0.000 | Catalase                                          |
| Q5E9X4 | LRRC59    | 0.51 | 0.000 | Leucine-rich repeat-containing protein 59         |
| G8JKZ8 | TXN       | 0.51 | 0.000 | Thioredoxin                                       |
| A5D9E7 | HADHB     | 0.51 | 0.000 | Mitochondrial trifunctional protein, beta subunit |
| Q3SYU2 | EEF2      | 0.51 | 0.000 | Elongation factor 2 (EF-2)                        |
| D4QBB3 | HBB       | 0.51 | 0.000 | Hemoglobin beta                                   |
| F1MMP5 | ITIH1     | 0.50 | 0.000 | Inter-alpha-trypsin inhibitor heavy chain H1      |
| P31976 | EZR VIL2  | 0.49 | 0.000 | Ezrin (Cytovillin)                                |
| Q2KJH6 | SERPINH1  | 0.49 | 0.000 | Serpin H1                                         |
| Q2KJC5 | HADH      | 0.49 | 0.000 | Hydroxyacyl-Coenzyme A dehydrogenase              |
| E1BII3 |           | 0.49 | 0.000 | Uncharacterized protein                           |
| F1MBQ0 | DYNC1LI2  | 0.48 | 0.000 | Dynein cytoplasmic 1                              |
| G3MXE1 |           | 0.48 | 0.000 | Uncharacterized protein                           |
| F1MBC7 |           | 0.47 | 0.000 | Cytochrome c oxidase subunit 6A                   |
| Q8M444 | COX2      | 0.47 | 0.000 | Cytochrome c oxidase subunit 2                    |
| A6QLL8 | ALDOA     | 0.47 | 0.000 | Fructose-bisphosphate aldolase                    |
| P61356 | RPL27     | 0.46 | 0.000 | 60S ribosomal protein L27                         |
| Q5E9M1 | ARL6IP5   | 0.46 | 0.000 | PRA1 family protein 3                             |
| L7R5X3 | eef1d     | 0.45 | 0.000 | Eukaryotic translation elongation factor 1 delta  |
| G5E5A9 | FN1       | 0.45 | 0.000 | Fibronectin                                       |
| F1MJQ1 | RAB7A     | 0.45 | 0.000 | Ras-related protein Rab-7a                        |
| Q7M2Y2 |           | 0.44 | 0.000 | Tumor-specific transplantation antigen            |
| Q3ZBH0 | CCT2      | 0.44 | 0.000 | T-complex protein 1 subunit beta                  |
| P00435 | GPX1      | 0.44 | 0.000 | Glutathione peroxidase 1                          |
| A4FUA8 | CAPZA1    | 0.44 | 0.010 | F-actin-capping protein subunit alpha-1           |
| P68103 | EEF1A1    | 0.44 | 0.000 | Elongation factor 1-alpha 1                       |
| F1MB08 | ENO1      | 0.43 | 0.000 | Alpha-enolase                                     |
| P23805 | CGN1      | 0.43 | 0.000 | Conglutinin                                       |
| Q56JV7 |           | 0.43 | 0.000 | 40S ribosomal protein S30                         |
| Q3ZC87 | PKM2      | 0.43 | 0.000 | Pyruvate kinase                                   |

|        |           |      |       |                                                  |
|--------|-----------|------|-------|--------------------------------------------------|
| O46415 | FTL       | 0.42 | 0.000 | Ferritin light chain                             |
| P23935 | NDUFA5    | 0.42 | 0.000 | NADH dehydrogenase                               |
| P49951 | CLTC      | 0.42 | 0.000 | Clathrin heavy chain 1                           |
| Q3T0P6 | PGK1      | 0.42 | 0.000 | Phosphoglycerate kinase 1                        |
| Q95KZ6 | ECH       | 0.42 | 0.000 | Enoyl-CoA hydratase                              |
| Q5E983 | EEF1B     | 0.42 | 0.000 | Elongation factor 1-beta                         |
| Q3SZN8 | RNH1      | 0.42 | 0.000 | Ribonuclease/angiogenin inhibitor 1              |
| Q9BGI1 | PRDX5     | 0.41 | 0.000 | Peroxiredoxin-5, mitochondrial                   |
| G5E531 | TCP1      | 0.41 | 0.000 | T-complex protein 1 subunit alpha                |
| Q3YJL8 | BoLA      | 0.40 | 0.000 | MHC class I antigen                              |
| Q29RZ0 | ACAT1     | 0.40 | 0.000 | Acetyl-CoA acetyltransferase                     |
| Q17QY3 | NIPSNAP3A | 0.40 | 0.005 | Nipsnap homolog 3A                               |
| Q5W5U3 | HK1       | 0.40 | 0.015 | Hexokinase 1                                     |
| Q3T171 | RPL36     | 0.39 | 0.000 | 60S ribosomal protein L36                        |
| P46193 | ANXA1     | 0.39 | 0.000 | Annexin A1                                       |
| F1MTC2 | QARS      | 0.39 | 0.000 | Glutamine--tRNA ligase                           |
| Q3ZBS8 | TIMM8A    | 0.39 | 0.000 | Mitochondrial import inner membrane translocase  |
| G3MZD8 |           | 0.39 | 0.000 | Uncharacterized protein                          |
| P50397 | RABGDIB   | 0.38 | 0.000 | Rab GDP dissociation inhibitor beta              |
| P80311 | PPIB      | 0.38 | 0.000 | Peptidyl-prolyl cis-trans isomerase B            |
| P26779 | PSAP      | 0.38 | 0.000 | Prosaposin (Proactivator polypeptide)            |
| P19120 | HSPA8     | 0.38 | 0.000 | Heat shock cognate 71 kDa protein                |
| P52193 | CALR CRT  | 0.37 | 0.000 | Calreticulin (CRP55) (Calregulin)                |
| Q95M18 | HSP90B1   | 0.36 | 0.000 | Endoplasmic                                      |
| Q3SZ65 | EIF4A2    | 0.36 | 0.000 | Eukaryotic initiation factor 4A-II               |
| F1N3P2 | USP5      | 0.36 | 0.015 | Ubiquitinyl hydrolase 1                          |
| F1MKS3 | TXNDC5    | 0.35 | 0.000 | Thioredoxin domain-containing protein 5          |
| A6QNL5 | PDIA6     | 0.35 | 0.000 | chromobox 1                                      |
| Q861U5 |           | 0.35 | 0.000 | Similar to 40S ribosomal protein S18             |
| E1BHJ0 |           | 0.35 | 0.000 | Profilin                                         |
| P23356 | UCHL1     | 0.35 | 0.000 | Ubiquitin carboxyl-terminal hydrolase isozyme L1 |
| A1L5A7 | PDLIM7    | 0.34 | 0.000 | Enigma protein (PDZ and LIM domain protein 7)    |
| Q3SZ62 | PGAM1     | 0.34 | 0.000 | Phosphoglycerate mutase 1                        |
| A7Z057 | YWHAG     | 0.34 | 0.000 | 14-3-3 protein gamma (YWHAG protein)             |
| Q3ZC84 | CNDP2     | 0.34 | 0.000 | Cytosolic non-specific dipeptidase               |
| Q5E971 | TMED10    | 0.33 | 0.000 | Transmembrane emp24 domain-containing protein 10 |
| Q3ZCI9 | CCT8      | 0.33 | 0.000 | T-complex protein 1 subunit theta (TCP-1-theta)  |
| Q2TBQ5 | RPL7A     | 0.33 | 0.000 | 60S ribosomal protein L7a                        |
| Q27954 | COPA      | 0.33 | 0.000 | Coatomer subunit alpha                           |
| Q3ZBY4 | ALDOC     | 0.33 | 0.004 | Fructose-bisphosphate aldolase                   |
| Q0QEV5 | RPL18     | 0.33 | 0.000 | Ribosomal protein L18                            |
| C1K3N7 | TMSB4X    | 0.32 | 0.000 | Thymosin beta 4 X-linked                         |
| A3KN04 | RPN1      | 0.32 | 0.000 | Dolichyl-diphosphooligosaccharide--protein       |
| P62935 | PPIA      | 0.32 | 0.000 | Peptidyl-prolyl cis-trans isomerase A            |
| G8JKX9 |           | 0.32 | 0.000 | Uncharacterized protein                          |
| O02717 |           | 0.32 | 0.000 | Non-muscle myosin heavy chain                    |
| E1BHK2 | ADD1      | 0.31 | 0.000 | Adducin 1                                        |
| F1N6Y1 | GANAB     | 0.31 | 0.000 | Glucosidase II alpha subunit                     |
| Q56JX8 | RPS13     | 0.31 | 0.009 | 40S ribosomal protein S13                        |
| Q0II59 | PDXK      | 0.31 | 0.000 | Pyridoxal kinase                                 |

|        |         |      |       |                                                |
|--------|---------|------|-------|------------------------------------------------|
| Q3SZG7 | RPL13   | 0.31 | 0.000 | 60S ribosomal protein L13                      |
| Q3T165 | PHB     | 0.31 | 0.000 | Prohibitin                                     |
| A1XED1 |         | 0.30 | 0.000 | RPL7                                           |
| P61157 | ACTR3   | 0.30 | 0.000 | Actin-related protein 3 (Actin-2)              |
| F1MKZ5 |         | 0.30 | 0.000 | 40S ribosomal protein S6                       |
| Q3T0U3 | ES1     | 0.30 | 0.000 | Es1 protein                                    |
| P62261 | YWHAE   | 0.30 | 0.000 | 14-3-3 protein epsilon (14-3-3E)               |
| P42899 | RPLP2   | 0.30 | 0.000 | 60S acidic ribosomal protein P2                |
| Q56JV9 | RPS3A   | 0.30 | 0.000 | 40S ribosomal protein S3a                      |
| Q32PD5 | RPS19   | 0.30 | 0.000 | 40S ribosomal protein S19                      |
| O77834 | PRDX6   | 0.30 | 0.000 | Peroxiredoxin-6                                |
| Q3ZCF0 | DCTN2   | 0.30 | 0.000 | Dynactin subunit 2                             |
| Q32LM0 | SH3GLB1 | 0.30 | 0.000 | Endophilin-B1                                  |
| G8JKV5 | RPL14   | 0.29 | 0.000 | 60S ribosomal protein L14                      |
| Q3T0I5 | FIS1    | 0.29 | 0.023 | Mitochondrial fission 1 protein (Fis1 homolog) |
| Q6EWQ7 | EIF5A   | 0.29 | 0.000 | Eukaryotic translation initiation factor 5A-1  |
| A7Z014 | TKT     | 0.29 | 0.000 | TKT protein (Transketolase)                    |
| Q5E997 | CAPZA2  | 0.29 | 0.000 | F-actin-capping protein subunit alpha-2        |
| A5D7E8 | PDIA3   | 0.29 | 0.000 | Protein disulfide-isomerase                    |
| Q5E947 | PRDX1   | 0.29 | 0.000 | Peroxiredoxin-1                                |
| Q0VCX2 | HSPA5   | 0.29 | 0.000 | Endoplasmic reticulum chaperone BiP            |
| Q3T0X5 | PSMA1   | 0.28 | 0.000 | Proteasome subunit alpha type-1                |
| Q58DM9 | RPL27A  | 0.28 | 0.000 | Ribosomal protein L27a                         |
| Q58DW0 | RPL4    | 0.28 | 0.000 | 60S ribosomal protein L4                       |
| Q9BGI3 | PRDX2   | 0.27 | 0.000 | Peroxiredoxin-2                                |
| Q3T0S7 | RTRAF   | 0.27 | 0.000 | Chromosome 14 open reading frame 166 ortholog  |
| A5PK63 | RPS17   | 0.27 | 0.000 | 40S ribosomal protein S17                      |
| Q32PB9 | RPL38   | 0.27 | 0.000 | 60S ribosomal protein L38                      |
| F8UZU9 | RPSA    | 0.27 | 0.000 | 40S ribosomal protein SA                       |
| Q5E9E6 | RPL10A  | 0.27 | 0.000 | 60S ribosomal protein L10a                     |
| P61286 | PABPC1  | 0.27 | 0.000 | Polyadenylate-binding protein 1                |
| Q58DW5 | RPL5    | 0.27 | 0.000 | 60S ribosomal protein L5                       |
| A6H769 | RPS7    | 0.26 | 0.000 | 40S ribosomal protein S7                       |
| P19803 | ARHGDIA | 0.26 | 0.000 | Rho GDP-dissociation inhibitor 1               |
| Q862L6 |         | 0.26 | 0.000 | Similar to ribosomal protein L12               |
| Q3T087 | RPL11   | 0.26 | 0.000 | 60S ribosomal protein L11                      |
| P17248 | WARS    | 0.26 | 0.000 | Tryptophan--tRNA ligase, cytoplasmic           |
| Q58DQ3 | RPL6    | 0.25 | 0.000 | 60S ribosomal protein L6                       |
| Q56K14 | RPLP1   | 0.25 | 0.000 | 60S acidic ribosomal protein P1                |
| Q862I1 | RPL24   | 0.25 | 0.000 | 60S ribosomal protein L24                      |
| P53620 | COPG1   | 0.25 | 0.000 | Coatomer subunit gamma-1                       |
| F1N301 | RPL22   | 0.25 | 0.000 | Uncharacterized protein                        |
| Q861S4 | RPL21   | 0.24 | 0.000 | Similar to ribosomal protein L21               |
| F1N6U4 | SEPT9   | 0.24 | 0.005 | Septin 9                                       |
| B1H0W8 | Rpl3    | 0.24 | 0.005 | Ribosomal protein L3                           |
| Q0P569 | NUCB1   | 0.24 | 0.013 | Nucleobindin-1                                 |
| Q3T0K2 | CCT3    | 0.24 | 0.000 | T-complex protein 1 subunit gamma              |
| P26884 | FKBP3   | 0.24 | 0.007 | Peptidyl-prolyl cis-trans isomerase FKBP3      |
| F1MZN7 | SNX2    | 0.24 | 0.001 | Sorting nexin-2                                |
| Q3T057 | RPL23   | 0.24 | 0.000 | 60S ribosomal protein L23                      |

|        |           |      |       |                                                 |
|--------|-----------|------|-------|-------------------------------------------------|
| G3X7D5 | LOC787803 | 0.23 | 0.000 | Uncharacterized protein                         |
| Q9BEH4 |           | 0.23 | 0.000 | Ribosomal protein L9-like protein               |
| Q27971 | CAPN2     | 0.23 | 0.000 | Calpain-2 catalytic subunit                     |
| Q2KHX6 | CRYM      | 0.23 | 0.000 | Ketimine reductase mu-crystallin                |
| Q27970 | CAPN1     | 0.22 | 0.010 | Calpain-1 catalytic subunit                     |
| E1B748 | HYOU1     | 0.22 | 0.000 | Hypoxia up-regulated protein 1 precursor        |
| A5D987 | UBE2N     | 0.22 | 0.000 | Ubiquitin-conjugating enzyme E2N-like           |
| E1BBY7 | HSPA4     | 0.22 | 0.000 | Heat shock protein family A (Hsp70) member 4    |
| Q3T035 | ARPC3     | 0.22 | 0.000 | Actin-related protein 2/3 complex subunit 3     |
| F1MC48 | IQGAP1    | 0.22 | 0.000 | IQ motif containing GTPase activating protein 1 |
| G3MWT9 | AKAP12    | 0.21 | 0.003 | A-kinase anchoring protein 12                   |
| Q3ZBD7 | GPI       | 0.21 | 0.000 | Glucose-6-phosphate isomerase (GPI)             |
| P79134 | ANXA6     | 0.21 | 0.000 | Annexin A6 (Annexin VI) (Annexin-6)             |
| E1BMW2 | AP2A1     | 0.21 | 0.009 | AP-2 complex subunit alpha                      |
| Q76I81 | RPS12     | 0.21 | 0.000 | 40S ribosomal protein S12                       |
| Q3T0B7 | RPS27L    | 0.21 | 0.000 | 40S ribosomal protein S27-like                  |
| A7E3S8 | ST13      | 0.21 | 0.000 | Heat shock 70kD protein binding protein         |
| E1BJB1 | TUBB2A    | 0.21 | 0.000 | Tubulin beta chain                              |
| G3N0K3 |           | 0.21 | 0.000 | 40S ribosomal protein S4                        |
| F1MQ37 | MYH9      | 0.20 | 0.000 | Myosin heavy chain 9                            |
| Q3T169 | RPS3      | 0.20 | 0.000 | 40S ribosomal protein S3 (EC 4.2.99.18)         |
| G3N0I4 | LAP3      | 0.19 | 0.000 | Cytosol aminopeptidase                          |
| G8JKY0 | RPS8      | 0.19 | 0.000 | 40S ribosomal protein S8                        |
| P61585 | RHOA      | 0.19 | 0.000 | Transforming protein RhoA (Gb) (p21)            |
| Q32LE5 | ASRGL1    | 0.19 | 0.005 | Isoaspartyl peptidase/L-asparaginase            |
| G5E6M8 | RPS10     | 0.19 | 0.000 | 40S ribosomal protein S10                       |
| G5E5C8 | TALDO1    | 0.19 | 0.000 | Transaldolase (EC 2.2.1.2)                      |
| Q3T0X6 | RPS16     | 0.19 | 0.000 | 40S ribosomal protein S16                       |
| Q5E988 | RPS5      | 0.18 | 0.014 | 40S ribosomal protein S5                        |
| P52556 | BLVRB     | 0.17 | 0.010 | Flavin reductase (NADPH)                        |
| Q2HJ11 | SDHA      | 0.17 | 0.021 | Succinate dehydrogenase                         |
| E1BFV0 | KPNB1     | 0.17 | 0.005 | Karyopherin subunit beta 1                      |
| Q3MHL7 | CCT6A     | 0.16 | 0.000 | T-complex protein 1 subunit zeta                |
| F1MRG7 | ACTR2     | 0.16 | 0.000 | Actin-related protein 2                         |
| G5E631 | DDX3X     | 0.16 | 0.002 | DEAD-box helicase 3, X-linked                   |
| Q3SYT9 | PCBP2     | 0.16 | 0.000 | Poly(RC) binding protein 2                      |
| Q2HJ81 | TUBB6     | 0.16 | 0.000 | Tubulin beta-6 chain                            |
| E1BDX8 | DYNC1H1   | 0.16 | 0.010 | Cytoplasmic dynein 1 heavy chain 1              |
| P81947 |           | 0.16 | 0.000 | Tubulin alpha-1B chain                          |
| Q3T0F7 | MTPN      | 0.15 | 0.002 | Myotrophin                                      |
| Q9TS10 |           | 0.15 | 0.037 | Dolichyl-diphosphooligosaccharide--protein      |
| F1MEN8 | PDIA4     | 0.15 | 0.000 | Protein disulfide-isomerase A4                  |
| G3N2G7 | MAP4      | 0.15 | 0.017 | Microtubule-associated protein                  |
| G1K192 | ARL3      | 0.15 | 0.000 | ADP-ribosylation factor-like protein 3          |
| Q0VCK0 | ATIC PURH | 0.15 | 0.000 | Bifunctional purine biosynthesis protein        |
| Q2NKU4 | CARHSP1   | 0.15 | 0.000 | Calcium regulated heat stable protein 1         |
| F1N6C0 | CALM2     | 0.15 | 0.000 | Calmodulin                                      |
| Q5E9A3 | PCBP1     | 0.14 | 0.000 | Poly(rC)-binding protein 1 (Alpha-CP1)          |
| Q2HJ49 | MSN       | 0.14 | 0.000 | Moesin                                          |
| P63103 | YWHAZ     | 0.14 | 0.000 | 14-3-3 protein zeta/delta                       |

|        |           |       |       |                                                  |
|--------|-----------|-------|-------|--------------------------------------------------|
| B0JYL8 | CFL1      | 0.14  | 0.000 | Cofilin 1 (Non-muscle)                           |
| Q862B7 |           | 0.14  | 0.001 | Similar to ribosomal protein S14                 |
| P00570 | AK1       | 0.13  | 0.000 | Adenylate kinase isoenzyme 1 (AK 1)              |
| G3MXC8 | ARPC5     | 0.13  | 0.027 | Actin-related protein 2/3 complex subunit 5      |
| Q56JU9 | RPS24     | 0.13  | 0.017 | 40S ribosomal protein S24                        |
| Q0VCY8 | PEA15     | 0.13  | 0.000 | Phosphoprotein enriched in astrocytes 15         |
| P60712 | ACTB      | 0.12  | 0.000 | Actin, cytoplasmic 1 (Beta-actin)                |
| Q3SZJ7 | LAMP2     | 0.12  | 0.000 | Lysosomal-associated membrane protein 2          |
| G5E5T5 |           | 0.11  | 0.000 | Uncharacterized protein                          |
| Q3T0E0 | ATOX1     | 0.11  | 0.008 | Copper transport protein ATOX1                   |
| Q3SYV4 | CAP1      | 0.11  | 0.003 | Adenylyl cyclase-associated protein 1 (CAP 1)    |
| E1BFB9 | FAM114A1  | 0.11  | 0.003 | Protein FAM114A2                                 |
| P51122 | ANP32A    | 0.10  | 0.001 | Acidic leucine-rich nuclear phosphoprotein 32    |
| Q76LV2 | HSP90AA1  | 0.10  | 0.000 | Heat shock protein HSP 90-alpha                  |
| F1N7T1 | CYB5R3    | 0.09  | 0.034 | NADH-cytochrome b5 reductase                     |
| Q2KJD0 | TUBB5     | 0.08  | 0.000 | Tubulin beta-5 chain                             |
| Q3ZCK2 | RALA      | 0.08  | 0.005 | RAS like proto-oncogene A (V-ras simian leukemia |
| Q1RMP3 | CUTA      | 0.07  | 0.000 | CutA divalent cation tolerance homolog (E. coli) |
| P81623 | ERP29     | 0.07  | 0.012 | Endoplasmic reticulum resident protein 29        |
| E1B9K1 | UBC       | 0.06  | 0.001 | Polyubiquitin-C                                  |
| P48616 | VIM       | 0.06  | 0.000 | Vimentin                                         |
| F1N7Q7 | COL4A2    | 0.05  | 0.048 | Collagen alpha-2(IV) chain                       |
| F1MTV9 | NPM1      | 0.05  | 0.010 | Nucleophosmin                                    |
| K4JDR8 | A2M       | -0.05 | 0.019 | Alpha-2-macroglobulin variant 5                  |
| Q3T0D0 | HNRNPK    | -0.07 | 0.003 | Heterogeneous nuclear ribonucleoprotein K        |
| Q2KIS8 | SNRPD3    | -0.08 | 0.000 | Small nuclear ribonucleoprotein D3 polypeptide 1 |
| G3X8G9 |           | -0.08 | 0.007 | Uncharacterized protein                          |
| A5D7D1 | ACTN4     | -0.08 | 0.000 | Alpha-actinin-4 (Non-muscle alpha-actinin 4)     |
| E1BNQ9 | HNRNPUL2  | -0.09 | 0.003 | Uncharacterized protein                          |
| A6H744 | UBE2I     | -0.09 | 0.000 | SUMO-conjugating enzyme UBC9                     |
| Q8HYY3 |           | -0.09 | 0.004 | L-caldesmon                                      |
| F1MPD1 | MRC2      | -0.09 | 0.002 | Mannose receptor C type 2                        |
| V6F7P3 | PAFAH1B2  | -0.09 | 0.000 | Platelet-activating factor acetylhydrolase IB    |
| F1N7N1 | QKI       | -0.09 | 0.000 | QKI, KH domain containing RNA binding            |
| F1MIH2 | SEPT7     | -0.09 | 0.026 | Septin-7                                         |
| Q3MHN0 | PSMB6     | -0.10 | 0.021 | Proteasome subunit beta type-6                   |
| Q5E946 | PARK7     | -0.11 | 0.002 | Protein/nucleic acid deglycase DJ-1              |
| A5PJE3 | FGA       | -0.12 | 0.000 | Fibrinogen alpha chain                           |
| F1MFT4 | HNRNPU    | -0.12 | 0.000 | Heterogeneous nuclear ribonucleoprotein U        |
| Q2NKY7 | SEPT2     | -0.12 | 0.000 | Septin-2                                         |
| Q2KIU3 |           | -0.12 | 0.026 | Protein HP-25 homolog 2                          |
| P62833 | RAP1A     | -0.12 | 0.000 | Ras-related protein Rap-1A (GTP-binding protein) |
| G3N3L9 | LOC613363 | -0.12 | 0.000 | Uncharacterized protein                          |
| E1BEG2 | HNRNPA3   | -0.12 | 0.000 | Heterogeneous nuclear ribonucleoprotein A3       |
| B0JYQ0 | ALB       | -0.13 | 0.050 | ALB protein                                      |
| Q3T0C7 | STMN1     | -0.13 | 0.006 | Stathmin                                         |
| Q3SX33 | THY1      | -0.13 | 0.010 | Thy-1 cell surface antigen                       |
| G1K208 | ACSF2     | -0.14 | 0.003 | Acyl-CoA synthetase family member 2              |
| Q3ZC44 | HNRNPAB   | -0.14 | 0.000 | Heterogeneous nuclear ribonucleoprotein A/B      |
| A6H6Y0 | HNRNPD    | -0.14 | 0.000 | Heterogeneous nuclear ribonucleoprotein          |

|           |          |       |       |                                                       |
|-----------|----------|-------|-------|-------------------------------------------------------|
| E1BMD6    | LPP      | -0.14 | 0.000 | LIM domain containing preferred translocation protein |
| Q7SIH1    | A2M      | -0.14 | 0.000 | Alpha-2-macroglobulin (Alpha-2-M)                     |
| P62871    | GNB1     | -0.14 | 0.011 | Guanine nucleotide-binding protein G(I)               |
| Q2KJC7    | POSTN    | -0.14 | 0.043 | Periostin (Periostin variant 7)                       |
| E1BQ37    | SFPQ     | -0.14 | 0.001 | Splicing factor proline and glutamine rich            |
| F1MER7    | HSPG2    | -0.14 | 0.000 | Heparan sulfate proteoglycan 2                        |
| P00515    | PRKAR2A  | -0.14 | 0.000 | cAMP-dependent PK type II-alpha regulatory subunit    |
| A6QR15    | TPM4     | -0.15 | 0.000 | LOC535277 protein (Tropomyosin 4)                     |
| Q9GLX9    | SPON1    | -0.15 | 0.001 | Spondin-1 (F-spondin)                                 |
| Q3ZC07    | ACTC1    | -0.15 | 0.000 | Actin, alpha cardiac muscle 1                         |
| Q2KJ32    | SELENBP1 | -0.15 | 0.002 | Methanethiol oxidase (MTO)                            |
| F1MSI2    | AGRN     | -0.15 | 0.000 | Agrin                                                 |
| Q3SZZ9    | FGG      | -0.15 | 0.000 | FGG protein (Fibrinogen gamma-B chain)                |
| F1MAV0    | FGB      | -0.16 | 0.000 | Fibrinogen beta chain                                 |
| Q5E9E2    | MYL9     | -0.16 | 0.000 | Myosin regulatory light polypeptide 9                 |
| P02253    | HIST1H1C | -0.17 | 0.004 | Histone H1.2                                          |
| F1MHR6    | KHSRP    | -0.17 | 0.000 | KH-type splicing regulatory protein                   |
| Q28009    | FUS      | -0.17 | 0.000 | RNA-binding protein FUS (Protein pigpen)              |
| D3JUI8    | RBMX     | -0.17 | 0.001 | RNA-binding motif protein, X chromosome               |
| F1MF97    | NID2     | -0.18 | 0.000 | Nidogen 2                                             |
| P11017    | GNB2     | -0.18 | 0.002 | Guanine nucleotide-binding protein G(I)               |
| Q5KR48    | TPM2     | -0.18 | 0.000 | Tropomyosin beta chain                                |
| F1N7I5    | NUMA1    | -0.19 | 0.003 | Nuclear mitotic apparatus protein 1                   |
| Q3B7N2    | ACTN1    | -0.19 | 0.000 | Alpha-actinin-1                                       |
| P21809    | BGN      | -0.20 | 0.002 | Biglycan (Bone/cartilage proteoglycan I)              |
| A7MB21    | FERMT2   | -0.20 | 0.006 | FERMT2 protein (Fermitin family member 2)             |
| E1B8P9    | MAPK3    | -0.20 | 0.006 | Mitogen-activated protein kinase                      |
| O02675    | DPYSL2   | -0.20 | 0.000 | Dihydropyrimidinase-related protein 2                 |
| F1MWK8    | PTK7     | -0.20 | 0.013 | Protein tyrosine kinase 7 (inactive)                  |
| Q08E18    | HDGF     | -0.21 | 0.001 | HDGF protein                                          |
| G5E505    | ILK      | -0.21 | 0.000 | Integrin-linked protein kinase                        |
| A7MBI5    | DPYSL3   | -0.21 | 0.000 | DPYSL3 protein (Dihydropyrimidinase like 3)           |
| A6QP73    | DDX31    | -0.21 | 0.000 | RNA helicase                                          |
| V6F957    | TAGLN    | -0.21 | 0.000 | Transgelin                                            |
| Q3B7M5    | LASP1    | -0.21 | 0.000 | LIM and SH3 domain protein 1 (LASP-1)                 |
| Q3SZR8    | SRSF3    | -0.21 | 0.000 | Serine/arginine-rich splicing factor 3                |
| P60902    | S100A10  | -0.21 | 0.000 | Protein S100-A10 (Calpactin I light chain)            |
| F1N2L9    | ALDH9A1  | -0.21 | 0.032 | 4-trimethylaminobutyraldehyde dehydrogenase           |
| Q2KJH0    | TMOD3    | -0.21 | 0.020 | Tropomodulin 3                                        |
| A7YWB6    | TGFBI    | -0.22 | 0.000 | Transforming growth factor-beta-induced protein       |
| A3KMV6    | HNRNPR   | -0.22 | 0.045 | Heterogeneous nuclear ribonucleoprotein               |
| Q3MHY1    | CSRP1    | -0.22 | 0.000 | Cysteine and glycine-rich protein 1                   |
| Q28824    | MYLK     | -0.23 | 0.000 | Myosin light chain kinase, smooth muscle (MLCK)       |
| Q3SYU6    | CNN2     | -0.23 | 0.000 | Calponin-2                                            |
| F1MYC9    | SPTBN1   | -0.23 | 0.000 | Spectrin beta chain                                   |
| P79136    | CAPZB    | -0.23 | 0.016 | F-actin-capping protein subunit beta (CapZ beta)      |
| F1MK08    | TPP1     | -0.23 | 0.001 | Tripeptidyl-peptidase 1                               |
| Q5EA67    | ITI4     | -0.24 | 0.000 | Inter-alpha (Globulin) inhibitor H4                   |
| A0A0F7RPX | MIF      | -0.24 | 0.000 | Macrophage migration inhibitory factor                |
| Q9BGU1    | BTHRG    | -0.24 | 0.000 | Histidine-rich glycoprotein                           |

|           |          |       |       |                                                   |
|-----------|----------|-------|-------|---------------------------------------------------|
| Q5E9A1    | NACA     | -0.24 | 0.007 | Nascent polypeptide-associated complex subunit a  |
| F1MD77    | LAMC1    | -0.24 | 0.001 | Laminin subunit gamma 1                           |
| A7MBH9    | GNAI2    | -0.24 | 0.000 | G protein subunit alpha i2                        |
| P06868    | PLG      | -0.25 | 0.000 | Plasminogen                                       |
| Q2KIV8    | GSTM3    | -0.25 | 0.000 | Glutathione S-transferase                         |
| A0A0F6QNP | C3       | -0.27 | 0.000 | Complement component 3                            |
| Q2KIS7    | CLEC3B   | -0.27 | 0.000 | Tetranectin (TN)                                  |
| F1N1I6    | GSN      | -0.27 | 0.000 | Gelsolin                                          |
| Q3MHL4    | AHCY     | -0.27 | 0.000 | Adenosylhomocysteinase (AdoHcyase)                |
| Q5EAD2    | PHGDH    | -0.27 | 0.018 | D-3-phosphoglycerate dehydrogenase                |
| F1MMK9    | AMBP     | -0.27 | 0.000 | Protein AMBP                                      |
| F1MXI4    | MATR3    | -0.27 | 0.000 | Uncharacterized protein                           |
| E1BFB0    | SPTAN1   | -0.28 | 0.000 | Spectrin alpha                                    |
| G5E5N3    | DHX9     | -0.28 | 0.000 | ATP-dependent RNA helicase A                      |
| A6QLZ3    | ARSB     | -0.28 | 0.001 | ARSB protein (Arylsulfatase B)                    |
| Q148F8    | HSPB6    | -0.28 | 0.006 | Heat shock protein beta-6 (HspB6)                 |
| Q3SZV7    | HPX      | -0.28 | 0.000 | Hemopexin                                         |
| F1N169    | FLNA     | -0.28 | 0.000 | Filamin A                                         |
| E1BNE7    | CAVIN1   | -0.29 | 0.000 | Caveolae associated protein 1                     |
| F1N789    | VCL      | -0.29 | 0.000 | Vinculin                                          |
| Q27966    | MYO1C    | -0.29 | 0.000 | Unconventional myosin-Ic                          |
| A6QPP2    | SERPIND1 | -0.30 | 0.000 | SERPIND1 protein (Serp family D member 1)         |
| P02769    | ALB      | -0.31 | 0.000 | Serum albumin (BSA) (allergen Bos d 6)            |
| Q9XSA7    | CLIC4    | -0.31 | 0.000 | Chloride intracellular channel protein 4          |
| E1BA17    | COL14A1  | -0.31 | 0.000 | Collagen type XIV alpha 1 chain                   |
| P13696    | PEBP1    | -0.31 | 0.000 | Phosphatidylethanolamine-binding protein 1        |
| P68432    |          | -0.32 | 0.000 | Histone H3.1                                      |
| E1BH06    |          | -0.32 | 0.000 | Uncharacterized protein                           |
| P60661    | MYL6     | -0.32 | 0.000 | Myosin light polypeptide 6                        |
| E1BB17    | HNRNPH3  | -0.32 | 0.000 | Heterogeneous nuclear ribonucleoprotein H3        |
| E1BHR3    | HDGFL3   | -0.32 | 0.001 | Hepatoma-derived growth factor-related protein 3  |
| Q5KR49    | TPM1     | -0.33 | 0.000 | Tropomyosin alpha-1 chain                         |
| Q2KIT0    |          | -0.33 | 0.000 | Protein HP-20 homolog                             |
| Q2KIF2    | LRG1     | -0.33 | 0.000 | Leucine-rich alpha-2-glycoprotein 1               |
| E1BI02    | FMOD     | -0.33 | 0.000 | Fibromodulin                                      |
| Q8WMQ6    |          | -0.33 | 0.000 | Filamin A (Fragment)                              |
| A6QM11    | TRH      | -0.33 | 0.000 | Pro-thyrotropin-releasing hormone                 |
| Q3MHN5    | GC       | -0.33 | 0.000 | Vitamin D-binding protein                         |
| Q3MHZ4    | TGFB1I1  | -0.33 | 0.000 | Transforming growth factor beta-1-induced protein |
| F1N401    | COL12A1  | -0.33 | 0.000 | Collagen alpha-1(XII) chain                       |
| I7CT57    |          | -0.34 | 0.000 | Vitamin D binding protein                         |
| Q08DB4    | CPNE1    | -0.34 | 0.000 | Copine-1 (Copine I)                               |
| Q08DJ3    | FUBP1    | -0.34 | 0.013 | Far upstream element (FUSE) binding protein 1     |
| P28801    | GSTP1    | -0.34 | 0.000 | Glutathione S-transferase P                       |
| F6Q9S4    | PRKAR2B  | -0.35 | 0.000 | cAMP-dependent PK type II-beta regulatory subunit |
| F1MNV5    | KNG1     | -0.35 | 0.000 | Kininogen-1                                       |
| Q95121    | SERPINF1 | -0.35 | 0.000 | Pigment epithelium-derived factor (PEDF) (Serp)   |
| P01044    | KNG1     | -0.35 | 0.000 | Kininogen-1                                       |
| G3MZ95    | FHL1     | -0.35 | 0.000 | Four and a half LIM domains 1                     |
| Q29443    | TF       | -0.36 | 0.000 | Serotransferrin (Transferrin)                     |

|        |          |       |       |                                                      |
|--------|----------|-------|-------|------------------------------------------------------|
| P81644 | APOA2    | -0.36 | 0.000 | Apolipoprotein A-II                                  |
| F6QVC9 | ANXA5    | -0.36 | 0.000 | Annexin                                              |
| Q32S29 | H2B      | -0.36 | 0.000 | Histone H2B                                          |
| Q28085 | CFH HF1  | -0.36 | 0.000 | Complement factor H (H factor 1)                     |
| O62654 | DES      | -0.36 | 0.000 | Desmin                                               |
| Q5E962 | AKR1B1   | -0.37 | 0.000 | Aldo-keto reductase family 1, member B1              |
| Q27991 | MYH10    | -0.37 | 0.000 | Myosin-10 (Cellular myosin heavy chain, type B)      |
| Q3T106 | SRSF7    | -0.37 | 0.000 | Serine/arginine-rich splicing factor 7               |
| G3MYZ3 | AFM      | -0.38 | 0.000 | Afamin (Alpha-albumin)                               |
| F1MWN3 | NID1     | -0.38 | 0.000 | Nidogen 1                                            |
| E1BF47 | TPR      | -0.38 | 0.000 | Translocated promoter region, nuclear basket protein |
| F1MCK2 | AHNAK    | -0.38 | 0.000 | AHNAK nucleoprotein                                  |
| Q27965 | HSPA1B   | -0.39 | 0.000 | Heat shock 70 kDa protein 1B                         |
| F1MNT4 | LAMB1    | -0.39 | 0.000 | Laminin subunit beta 1                               |
| Q5GN72 | AGP      | -0.39 | 0.000 | Alpha-1-acid glycoprotein                            |
| P02453 | COL1A1   | -0.39 | 0.000 | Collagen alpha-1(I)                                  |
| A8E644 | DCLK1    | -0.39 | 0.000 | DCLK1 protein (Doublecortin like kinase 1)           |
| F1MSQ9 | TMPO     | -0.40 | 0.000 | Thymopoietin                                         |
| P62739 | ACTA2    | -0.40 | 0.000 | Actin, aortic smooth muscle (Alpha-actin-2)          |
| I6X9I8 |          | -0.40 | 0.027 | Annexin                                              |
| E1B8N6 | LMNB1    | -0.40 | 0.000 | Lamin B1                                             |
| G3N0V0 |          | -0.40 | 0.000 | Uncharacterized protein                              |
| Q32PI4 | CFI      | -0.41 | 0.000 | Complement factor I                                  |
| Q2KJF1 | A1BG     | -0.41 | 0.000 | Alpha-1B-glycoprotein                                |
| P81287 | ANXA5    | -0.41 | 0.000 | Annexin A5                                           |
| O46375 | TTR      | -0.41 | 0.000 | Transthyretin                                        |
| P34955 | SERPINA1 | -0.41 | 0.000 | Alpha-1-antiproteinase (Alpha-1-antitrypsin)         |
| Q2TBR3 | SET      | -0.42 | 0.000 | SET nuclear oncogene                                 |
| P17690 | APOH     | -0.42 | 0.000 | Beta-2-glycoprotein 1 (Apolipoprotein H) (Apo-H)     |
| P00735 | F2       | -0.42 | 0.000 | Prothrombin                                          |
| E1BMJ0 | SERPING1 | -0.42 | 0.000 | Factor XIIa inhibitor precursor                      |
| Q29437 |          | -0.42 | 0.000 | Primary amine oxidase, liver isozyme                 |
| F1N076 | CP       | -0.43 | 0.000 | Ceruloplasmin                                        |
| A5D7U9 | DCPS     | -0.43 | 0.001 | DCPS protein (m7GpppX diphosphatase)                 |
| Q3MHN2 | C9       | -0.43 | 0.000 | Complement component C9                              |
| Q2HJ65 | H2AFY    | -0.43 | 0.000 | Core histone macro-H2A                               |
| Q148J6 | ARPC4    | -0.44 | 0.018 | Actin-related protein 2/3 complex subunit 4          |
| G5E6N7 | CBX1     | -0.44 | 0.000 | Chromobox 1                                          |
| F1MZ96 |          | -0.44 | 0.000 | Uncharacterized protein                              |
| Q32LA7 | H2AFV    | -0.45 | 0.000 | Histone H2A.V (H2A.F/Z)                              |
| Q1LZF9 | MYL9     | -0.45 | 0.000 | Myosin regulatory light polypeptide 9                |
| P10103 | HMGB1    | -0.45 | 0.000 | High mobility group protein B1                       |
| G3X807 |          | -0.45 | 0.000 | Histone H4                                           |
| F1N3A1 | THBS1    | -0.46 | 0.000 | Thrombospondin-1                                     |
| E9RHW1 | HSPB1    | -0.46 | 0.000 | Heat shock 27kDa protein 1                           |
| B0JYN6 | AHSG     | -0.47 | 0.000 | Alpha-2-HS-glycoprotein                              |
| E1BGN3 | HIST2H3D | -0.47 | 0.004 | Histone H3                                           |
| Q05443 | LUM LDC  | -0.47 | 0.000 | Lumican                                              |
| F1MKG2 | COL6A2   | -0.48 | 0.000 | Collagen type VI alpha 2 chain                       |
| Q9N0V4 | GSTM1    | -0.48 | 0.000 | Glutathione S-transferase Mu 1                       |

|            |           |       |       |                                                   |
|------------|-----------|-------|-------|---------------------------------------------------|
| Q2KIX7     |           | -0.49 | 0.000 | Protein HP-25 homolog 1                           |
| F1MSZ6     | SERPINC1  | -0.50 | 0.000 | Antithrombin-III                                  |
| Q3ZBS7     | VTN       | -0.50 | 0.000 | Vitronectin                                       |
| Q2TA04     | GNPMB     | -0.50 | 0.000 | Glycoprotein (Transmembrane) nmb                  |
| P21793     | DCN       | -0.51 | 0.000 | Decorin (Bone proteoglycan II) (PG-S2)            |
| P61283     | BANF1     | -0.51 | 0.000 | Barrier-to-autointegration factor                 |
| Q58D62     | FETUB     | -0.51 | 0.000 | Fetuin-B                                          |
| A0A0A0MPA0 |           | -0.52 | 0.000 | Uncharacterized protein                           |
| E1BI98     | COL6A1    | -0.52 | 0.000 | Collagen type VI alpha 1 chain                    |
| P81187     | CFB BF    | -0.52 | 0.000 | Complement factor B                               |
| Q687I9     | EDIP      | -0.53 | 0.000 | Purine nucleoside phosphorylase                   |
| E1BB91     | COL6A3    | -0.53 | 0.000 | Collagen type VI alpha 3 chain                    |
| Q3T0W4     | PPP1R7    | -0.53 | 0.000 | Protein phosphatase 1 regulatory subunit 7        |
| F1MY85     | C5        | -0.53 | 0.000 | Complement C5a anaphylatoxin                      |
| F1MYG5     | LMNA      | -0.54 | 0.000 | Lamin A/C                                         |
| F1MUK3     | IGFBP6    | -0.54 | 0.000 | Insulin-like growth factor-binding protein 6      |
| P02465     | COL1A2    | -0.55 | 0.000 | Collagen alpha-2(I)                               |
| E1BLS8     | EMILIN1   | -0.56 | 0.000 | Elastin microfibril interfacier 1                 |
| F1N453     | HIST2H2BE | -0.56 | 0.000 | Histone H2B                                       |
| A6QLN9     | VWA1      | -0.57 | 0.000 | von Willebrand factor A domain-containing protein |
| Q08DU9     | HP1BP3    | -0.57 | 0.000 | Heterochromatin protein 1-binding protein 3       |
| G5E6E8     |           | -0.57 | 0.000 | Histone H2B                                       |
| F2Z4I6     | HIST2H2A  | -0.57 | 0.000 | Histone H2A                                       |
| Q2KJ47     | EHD2      | -0.58 | 0.000 | EH-domain containing 2                            |
| Q3SYZ8     | PDLIM3    | -0.59 | 0.000 | PDZ and LIM domain protein 3                      |
| A6QLN6     | MYH11     | -0.60 | 0.000 | MYH11 protein                                     |
| P19427     | DPT       | -0.60 | 0.000 | Dermatopontin                                     |
| G3N131     | HIST1H1A  | -0.60 | 0.000 | Histone H1.1                                      |
| F1MMU4     | H1FX      | -0.61 | 0.000 | H1 histone family member X                        |
| P17697     | CLU       | -0.61 | 0.000 | Clusterin                                         |
| Q862M5     |           | -0.62 | 0.000 | Similar to acidic ribosomal phosphoprotein PO     |
| Q17QG8     | H2AFX     | -0.64 | 0.000 | Histone H2A                                       |
| G1K238     | COL4A1    | -0.65 | 0.000 | Collagen alpha-1(IV) chain                        |
| Q1RMN8     | IGL       | -0.66 | 0.000 | Immunoglobulin light chain lambda                 |
| F1MJA7     | CYP17A1   | -0.66 | 0.000 | Steroid 17-alpha-hydroxylase/17,20 lyase          |
| G3N0V2     | KRT1      | -0.66 | 0.000 | Keratin 1                                         |
| P55918     | MFAP4     | -0.69 | 0.000 | Microfibril-associated glycoprotein 4             |
| Q3T085     | OGN       | -0.70 | 0.000 | OGN protein                                       |
| Q29S21     | KRT7      | -0.71 | 0.000 | Keratin, type II cytoskeletal 7 (Cytokeratin-7)   |
| F1MVK1     |           | -0.71 | 0.000 | Uncharacterized protein                           |
| F1MEG3     | LAMA1     | -0.72 | 0.001 | Laminin subunit alpha 1                           |
| F2Z4J1     | HIST1H2AC | -0.72 | 0.000 | Histone H2A                                       |
| Q29RQ1     | C7        | -0.74 | 0.000 | Complement component C7                           |
| A6QNJ7     | PGM5      | -0.75 | 0.000 | PGM5 protein (Phosphoglucomutase 5)               |
| V6F9A2     | APOA1     | -0.75 | 0.000 | Apolipoprotein A-I preproprotein                  |
| M0QVY0     | KRT6A     | -0.76 | 0.000 | Uncharacterized protein                           |
| Q0VCP3     | OLFML3    | -0.77 | 0.000 | Olfactomedin-like protein 3                       |
| F1N583     | OLFML1    | -0.77 | 0.000 | Olfactomedin like 1                               |
| F1N4K8     | FBN1      | -0.78 | 0.000 | Fibrillin-1 (MP340)                               |
| A7E307     | DDX17     | -0.80 | 0.001 | DDX17 protein (DEAD-box helicase 17)              |

|                                                                                                 |            |       |       |                                                       |
|-------------------------------------------------------------------------------------------------|------------|-------|-------|-------------------------------------------------------|
| P50291                                                                                          | FST        | -0.82 | 0.000 | Fibrinogen alpha chain                                |
| Q0IIJ2                                                                                          | H1FO       | -0.82 | 0.000 | Histone H1.0                                          |
| E1BDK6                                                                                          | LAMB2      | -0.82 | 0.000 | Laminin subunit beta 2                                |
| A6QQQ3                                                                                          | PRELP      | -0.82 | 0.000 | Proline/arginine-rich end leucine-rich repeat protein |
| F1N6I7                                                                                          | VCAN       | -0.90 | 0.000 | Versican core protein                                 |
| Q8HYJ2                                                                                          | BLT        | -0.93 | 0.000 | Tryptase                                              |
| Q17QE2                                                                                          | LMCD1      | -0.96 | 0.000 | LIM and cysteine-rich domains protein 1               |
| Q1LZ92                                                                                          | H2AFY2     | -0.98 | 0.000 | Core histone macro-H2A                                |
| F6Q751                                                                                          | GSTM2      | -0.99 | 0.000 | Uncharacterized protein                               |
| Q3ZEJ6                                                                                          | SERPINA3-3 | -1.00 | 0.000 | Serpin A3-3                                           |
| Q8HZY1                                                                                          | SERPINE2   | -1.01 | 0.000 | Serine protease inhibitor clade E member 2            |
| V6F9A3                                                                                          | ApoC3      | -1.02 | 0.000 | Apolipoprotein C-III                                  |
| O18977                                                                                          | TN-X       | -1.12 | 0.000 | Tenascin-X                                            |
| F1MNL7                                                                                          | PTI        | -1.15 | 0.000 | Uncharacterized protein                               |
| Q9TTE1                                                                                          | SERPINA3A  | -1.23 | 0.000 | Serpin A3-1                                           |
| Q3MHP6                                                                                          | EIF4B      | -1.24 | 0.000 | Eukaryotic translation initiation factor 4B           |
| Q5E9F8                                                                                          | H3F3A/B    | -1.46 | 0.000 | Histone H3.3                                          |
| Q3ZBN5                                                                                          | ASPN       | -2.00 | 0.000 | Asporin                                               |
| <b>log2FC*</b> = log2 Fold Change in post-pubertal hieifers as compared to pre-pubertal heifers |            |       |       |                                                       |
| <b>Protein ID*</b> = Uniprot_accession protein ID                                               |            |       |       |                                                       |
