# Supplementary material for: Proteomics Recapitulates Ovarian Proteins Relevant to Puberty and Fertility in Brahman Heifers (Bos indicus L.)
Source: MDPI journal article supplement (doi:10.3390/genes10110923), 2019-11-12
Supplement: s1 [file s1]

**Supp. Table S2: Pathways and differential abundant proteins in post-pubertal heifers, as compared to pre-pubertal, involved in ovarian functions at puberty**

| No                                                   | Pathways                  | DA Proteins (Uniprot-Accession)                                                                                                                                                                                                                                                                                                                                                                                                                                                                                                                                                                                                                                                |
|------------------------------------------------------|---------------------------|--------------------------------------------------------------------------------------------------------------------------------------------------------------------------------------------------------------------------------------------------------------------------------------------------------------------------------------------------------------------------------------------------------------------------------------------------------------------------------------------------------------------------------------------------------------------------------------------------------------------------------------------------------------------------------|
| <b>Up-regulated Proteins Based Enriched Pathways</b> |                           |                                                                                                                                                                                                                                                                                                                                                                                                                                                                                                                                                                                                                                                                                |
| 1                                                    | Ribosome                  | Q3T0B7, Q5E9E6, Q3T087, Q3SZG7, G8JKV5, Q0QEV5, Q861S4, F1N301, Q3T057, Q862I1, P61356, Q58DM9, Q3T0L7, Q3T171, Q32PB9, Q58DW0, Q58DW5, Q58DQ3, Q2TBQ5, G5E6M8, Q76I81, Q56JX8, Q3T0X6, A5PK63, Q32PD5, Q56JU9, Q3T169, Q56JV9, Q5E988, F1MKZ5, A6H769, G8JKY0, F8UZU9, Q56K14, P42899                                                                                                                                                                                                                                                                                                                                                                                         |
| 2                                                    | Metabolic Pathways        | A6QR14, Q3ZC79, Q0VCK0, Q32PF2, Q7JAT2, P13621, F1MLB8, P00829, P05630, P05631, P13620, Q28851, P02721, Q3ZC84, P42028, Q3SZE6, P23935, Q02827, Q01321, Q29RZ0, Q1JPB6, Q3ZC41, P20004, F1MH57, Q3ZBF6, P00570, P08166, P48644, A6QLL8, Q3ZBY4, Q29RK1, A3KMX9, Q8M444, P00423, P00429, P00426, P00125, P11179, F1MB08, F1N647, Q148D3, F1MMK2, Q3ZBD7, F1N6Y1, P33097, P12344, F1MTC2, P10096, Q5W5U3, P14893, Q2KJC5, Q3SZ00, A5D9E7, O02691, Q0QEQ4, Q9XSG3, P41563, F1MTJ9, G3N0I4, Q3T145, Q32LG3, P11024, A1A4N9, Q3T0Q4, O77834, Q3ZCI4, Q3T0P6, Q3SZ62, Q6VBM2, Q0VCM4, Q0II59, F1MHB8, A3KN04, Q2HJI1, Q3MHX5, Q58DR8, G5E5C8, A7Z014, Q3MI02, P23004, P00126, P13272 |
| 3                                                    | Oxidative Phosphorylation | Q7JAT2, P13621, F1MLB8, P00829, P05630, P05631, P13620, Q28851, P02721, P42028, Q3SZE6, P23935, Q02827, Q01321, Q8M444, P00423, P00429, P00426, P00125, Q2HJI1, Q3MI02, P23004, P00126, P13272                                                                                                                                                                                                                                                                                                                                                                                                                                                                                 |

| Down-regulated Proteins Based Enriched Pathways |                                           |                                                                                                                                                                                |
|-------------------------------------------------|-------------------------------------------|--------------------------------------------------------------------------------------------------------------------------------------------------------------------------------|
| 1                                               | Complement and Coagulation Cascade        | K4JDR8, P00735, A0A0F6QNP7, E1BH06, F1MY85, Q29RQ1, Q3MHN2, P81187, Q28085, Q32PI4, A5PJE3, F1MAV0, Q3SZZ9, P01044, P06868, P34955, F1MSZ6, A6QPP2, E1BMJ0                     |
| 2                                               | Systemic Lupus Erythematosus              | Q32LA7, Q17QG8, Q2HJ65, Q1LZ92, Q5E9F8, Q3B7N2, A5D7D1, A0A0F6QNP7, E1BH06, F1MY85, Q29RQ1, Q3MHN2, G3N3L9, Q32S29, F2Z4J1, F2Z4I6, F1N453, E1BGN3, Q2KIS8                     |
| 3                                               | Focal Adhesion                            | P62833, Q3B7N2, A5D7D1, P02453, P02465, G1K238, E1BI98, F1MKG2, E1BB91, F1N169, G5E505, F1MEG3, F1MNT4, F1MD77, E1BDK6, E1B8P9, Q5E9E2, Q28824, O18977, F1N3A1, F1N789, Q3ZBS7 |
| 4                                               | Extracellular Matrix Receptor Interaction | F1MSI2, P02453, P02465, G1K238, E1BI98, F1MKG2, E1BB91, F1MER7, F1MEG3, F1MNT4, F1MD77, E1BDK6, O18977, F1N3A1, Q3ZBS7                                                         |
| 5                                               | Alcoholism                                | A7MBH9, P62871, P11017, Q32LA7, Q17QG8, Q2HJ65, Q1LZ92, Q5E9F8, G3N3L9, Q32S29, F2Z4J1, F2Z4I6, F1N453, E1BGN3, E1B8P9                                                         |
| Whole DA Proteins Based Functional Clusters     |                                           |                                                                                                                                                                                |
| 1                                               | Glycolysis                                | A6QLL8, Q3ZBY4, F1MB08, Q3ZBD7, P10096, Q5W5U3, Q3T0P6, Q3SZ62, Q3ZC87                                                                                                         |
| 2                                               | TCA Cycle                                 | Q32PF2, P20004, Q29RK1, P11179, Q148D3, Q9XSG3, P41563, Q3T145, Q32LG3, Q2HJI1, Q3MHX5, Q58DR8                                                                                 |
| 3                                               | Pentose Phosphate Pathway                 | A6QLL8, Q3ZBY4, F1MMK2, Q3ZBD7, Q3ZCI4, G5E5C8, A7Z014                                                                                                                         |

|    |                                          |                                                                                                                                                                                                |
|----|------------------------------------------|------------------------------------------------------------------------------------------------------------------------------------------------------------------------------------------------|
| 4  | Oxidative<br>Phosphorylation             | Q7JAT2, P13621, F1MLB8, P00829, P05630, P05631, P13620, Q28851, P02721, P42028, Q3SZE6, P23935, Q02827, Q01321, Q8M444, P00423, P00429, P00426, P00125, Q2HJI1, Q3MI02, P23004, P00126, P13272 |
| 5  | Fatty Acid Metabolism                    | Q29RZ0, Q1JPB6, Q3ZC41, Q3ZBF6, F1N647, Q2KJC5, Q3SZ00, A5D9E7, Q3ZCD7                                                                                                                         |
| 6  | Branched Chain Amino<br>Acid Degradation | A5D9E7, F1MH57, F1N2L9, O02691, Q1JPB6, Q29RZ0, Q2KJC5, Q3SZ00, Q3ZBF6, Q3ZC41, Q3ZC79                                                                                                         |
| 7  | Terpenoid Backbone<br>Biosynthesis       | Q3ZC79, Q29RZ0, Q1JPB6, F1MTJ9                                                                                                                                                                 |
| 8  | Cholesterol Metabolism                   | A6QR14, V6F9A2, P81644, P00432, A3KMX9, F1N7T1, P00257, Q148K8, F1MMK2, F1MTJ9                                                                                                                 |
| 9  | Cholesterol Efflux                       | P81644, V6F9A2, V6F9A3                                                                                                                                                                         |
| 10 | Ovarian<br>Steroidogenesis               | A6QR14, Q3MHN5, Q3ZC41, V6F9A2, P81644, P00432, A3KMX9, F1MJA7, F1N7T1, P00257, Q148K8, F1MMK2, P14893, F1MTJ9, Q3ZCD7                                                                         |
| 11 | Oocyte Maturation and<br>Oocyte Meiosis  | A7MBH9, Q76LV2, Q76LV1, E1B8P9, F1N6C0, A5D973, P62261, A7Z057, P63103, P00515, F6Q9S4, P08166                                                                                                 |
| 12 | cAMP Signalling                          | A7MBH9, P62833, F1N6C0, E1B8P9, Q1LZF9, P61585                                                                                                                                                 |
| 13 | Estrogen Signalling                      | A7MBH9, F1N6C0, Q27965, Q76LV2, Q76LV1, Q95M18, P19120, E1B8P9                                                                                                                                 |
| 14 | Cell Division                            | A7MBH9, P49951, G3N2G7, Q3T169, Q2NKY7, F1MIH2                                                                                                                                                 |

|    |                                  |                                                                                                                                                                                                                                                                                        |
|----|----------------------------------|----------------------------------------------------------------------------------------------------------------------------------------------------------------------------------------------------------------------------------------------------------------------------------------|
| 15 | Microtubule Processing           | Q3ZCF0, E1BJB1, Q2HJ81, Q2KJD0                                                                                                                                                                                                                                                         |
| 16 | Regulation of Actin Cytoskeleton | F1MC48, P60712, Q3T035, Q148J6, G3MXC8, Q3B7N2, A5D7D1, P00735, B0JYL8, P31976, G5E5A9, F1N1I6, E1B8P9, Q2HJ49, Q1LZF9, Q28824, Q5E9E2, P61585, C1K3N7, F1N789                                                                                                                         |
| 17 | Focal Adhesion                   | P62833, P60712, Q3B7N2, A5D7D1, Q27971, P02453, P02465, G1K238, F1N7Q7, E1BI98, F1MKG2, E1BB91, G5E5A9, F1N169, G5E505, F1MEG3, F1MNT4, F1MD77, E1BDK6, E1B8P9, Q1LZF9, Q28824, Q5E9E2, P61585, O18977, F1N3A1, F1N789, Q3ZBS7                                                         |
| 18 | Cell Matrix Adhesion             | F1MAV0, Q3SZZ9, F1MWN3, F1MF97, O18977                                                                                                                                                                                                                                                 |
| 19 | Protein Processing               | A7Z066, Q27970, Q27971, P52193, F1ME65, P81623, F1N6Y1, Q27965, Q76LV2, Q76LV1, Q95M18, Q0VCX2, P19120, E1B748, A6H7J6, A5D7E8, F1MEN8, A6QNL5, A3KN04, F1MDC1, G3X757                                                                                                                 |
| 20 | Ribosome                         | Q5E9E6, Q3T087, Q3SZG7, G8JKV5, Q0QEV5, Q861S4, F1N301, Q3T057, Q862I1, P61356, Q58DM9, Q3T0L7, Q3T171, Q32PB9, Q58DW0, Q58DW5, Q58DQ3, Q2TBQ5, G5E6M8, Q76I81, Q56JX8, Q3T0X6, A5PK63, Q32PD5, Q56JU9, Q3T0B7, Q3T169, Q56JV9, Q5E988, F1MKZ5, A6H769, G8JKY0, F8UZU9, Q56K14, P42899 |
| 21 | Translation                      | Q3SYU2, Q5E9E6, Q3T087, Q3SZG7, G8JKV5, Q0QEV5, Q861S4, Q3T057, Q862I1, P61356, Q58DM9, Q3T0L7, Q3T171, Q32PB9, Q58DW0, Q58DW5, Q58DQ3, Q2TBQ5, Q76I81, Q56JX8, Q3T0X6, A5PK63, Q32PD5, Q56JU9, Q3T0B7, Q3T169, Q56JV9, Q5E988,                                                        |

|    |                             |                                                                                                                                        |
|----|-----------------------------|----------------------------------------------------------------------------------------------------------------------------------------|
|    |                             | F1MKZ5, A6H769, G8JKY0, F8UZU9, F1MDC1, P79110, P12234, G3N3W3, P32007, A6QLN9                                                         |
| 22 | Nucleosome Assembly         | Q0IIJ2, F1MMU4, Q2HJ65, Q1LZ92, Q5E9F8, Q2TBR3, P51122, Q08DU9, P10103, G3N3L9, Q32S29, G3N131, P02253, P68432, E1BGN3                 |
| 23 | Regulation of Transcription | P51122, Q2NKU4, Q08DB4, Q08E18, Q08DU9, F1N0I2, Q3T169, E1BQ37, G8JKZ8, F1MSQ9                                                         |
| 24 | Cell Redox Homeostasis      | E1BJA2, P11024, Q5E947, Q9BGI3, P35705, Q9BGI1, O77834, A6H7J6, A5D7E8, F1MEN8, A6QNL5, Q5E936, G8JKZ8                                 |
| 25 | Glutathione Metabolism      | F1MMK2, Q9N0V4, F6Q751, Q28035, Q2KIV8, P28801, P00435, Q9XSG3, G3N0I4, Q3ZCI4, Q5E936                                                 |
| 26 | ECM Receptor Interaction    | F1MSI2, P02453, P02465, G1K238, F1N7Q7, E1BI98, F1MKG2, E1BB91, G5E5A9, F1MER7, F1MEG3, F1MNT4, F1MD77, E1BDK6, O18977, F1N3A1, Q3ZBS7 |
